# Supplementary material for: A genomic overview of short genetic variations in a basal chordate, Ciona intestinalis
Source: PubMed Central journal article supplement (PMC3424144; doi:10.1186/1471-2164-13-208), 2012-05-30
Supplement: 1471-2164-13-208-S1.pdf [file 1471-2164-13-208-S1.pdf]

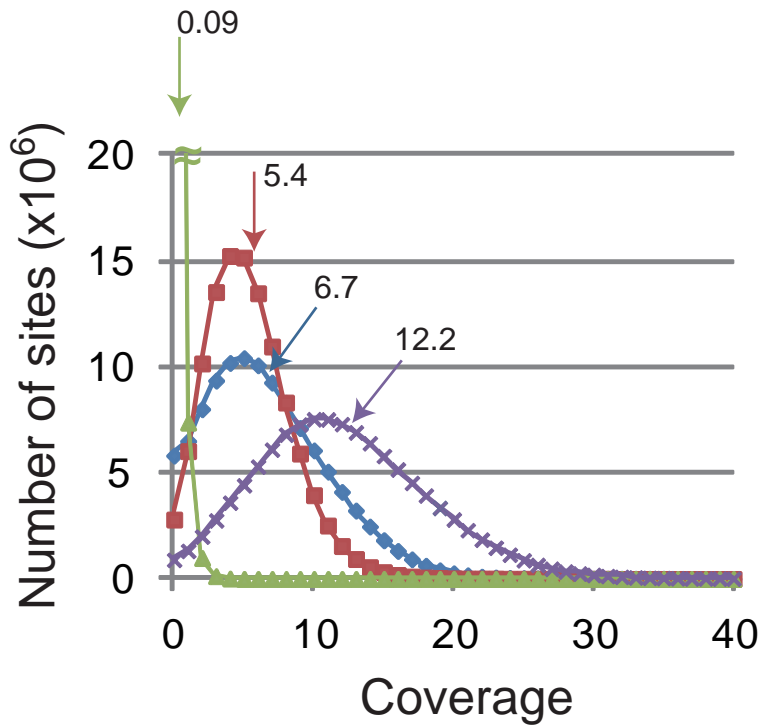

**Figure S1. Distribution of sequence coverage of the reference genome.** Red, light green and blue lines indicate distribution of sequence coverage by the US1, US2 and JP datasets, respectively. The purple line indicates distribution of total sequence coverage of the three datasets. Averages are indicated by arrows.

Table S1. Genetic variations in five genomic regions of 11 different animals

| Chromosome | Nucleotide position | Nucleotide in the reference | Variations identified | Individuals |        |        |        |        |        |        |        |        |        |        |
|------------|---------------------|-----------------------------|-----------------------|-------------|--------|--------|--------|--------|--------|--------|--------|--------|--------|--------|
|            |                     |                             |                       | 1           | 2      | 3      | 4      | 5      | 6      | 7      | 8      | 9      | 10     | 11     |
| 1          | 16308               | C                           | T                     | .           | .      | .      | .      | .      | .      | C/T    | .      | .      | .      | C/T    |
| 1          | 16357               | A                           | G                     | A/G         | G      | G      | .      | G      | A/G    | A/G    | A/G    | .      | A/G    | .      |
| 1          | 16367               | A                           | G                     | A/G         | G      | G      | .      | G      | A/G    | A/G    | A/G    | .      | A/G    | .      |
| 1          | 16374               | C                           | T                     | C/T         | C/T    | C/T    | .      | .      | .      | C/T    | C/T    | .      | C/T    | .      |
| 1          | 16392               | A                           | T                     | A/T         | T      | T      | T      | T      | A/T    | T      | T      | A/T    | T      | A/T    |
| 1          | 16400               | G                           | A                     | .           | .      | .      | .      | .      | .      | .      | .      | .      | .      | .      |
| 1          | 16415               | T                           | C                     | T/C         | C      | C      | C      | C      | T/C    | C      | C      | T/C    | C      | T/C    |
| 1          | 16435               | G                           | A                     | G/A         | A      | A      | A      | A      | G/A    | A      | A      | G/A    | A      | G/A    |
| 1          | 16444               | C                           | A                     | A/C         | A      | A      | A/C    | A      | C/A    | C/A    | A      | .      | A      | .      |
| 1          | 16447               | C                           | G                     | C/G         | G      | G      | C/G    | G      | C/G    | C/G    | G      | .      | G      | .      |
| 1          | 16450               | T                           | Deletion              | hetero      | homo   | homo   | hetero | .      | hetero | hetero | homo   | .      | homo   | .      |
| 1          | 16461               | C                           | T                     | -           | .      | .      | -      | .      | -      | -      | .      | .      | .      | .      |
| 1          | 16472               | G                           | A                     | -           | G/A    | G/A    | -      | .      | -      | -      | G/A    | .      | G/A    | .      |
| 1          | 16482               | C                           | T                     | -           | C/T    | C/T    | -      | .      | -      | -      | C/T    | .      | C/T    | .      |
| 1          | 16497 *             | T                           | C                     | -           | .      | .      | -      | .      | -      | -      | T/C    | .      | .      | .      |
| 1          | 16499               | A                           | G                     | -           | .      | .      | -      | .      | -      | -      | .      | .      | .      | .      |
| 1          | 16509               | A                           | T                     | -           | T      | T      | -      | .      | -      | -      | T      | T      | T      | T      |
| 1          | 16541               | A                           | G                     | -           | G      | G      | -      | G      | A/G    | -      | G      | A/G    | G      | A/G    |
| 1          | 16542               | C                           | A                     | -           | A      | A      | -      | A      | C/A    | -      | A      | C/A    | A      | C/A    |
| 1          | 16545               | A                           | C                     | -           | C      | C      | -      | C      | -      | -      | .      | .      | .      | .      |
| 1          | 16575               | G                           | T                     | -           | G/T    | G/T    | .      | .      | .      | -      | G/T    | .      | G/T    | .      |
| 1          | 16579               |                             | Insertion             | hetero      | hetero | hetero | .      | .      | .      | hetero | hetero | .      | hetero | .      |
| 1          | 16582 *             | C                           | A                     | .           | .      | .      | C/A    | .      | .      | .      | .      | C/A    | .      | .      |
| 1          | 16594 *             | T                           | A                     | .           | .      | .      | T/A    | .      | .      | .      | .      | T/A    | .      | .      |
| 1          | 16634               | C                           | T                     | C/T         | C/T    | C/T    | .      | .      | .      | C/T    | C/T    | .      | C/T    | .      |
| 1          | 16678               | G                           | A                     | G/A         | A      | A      | G/A    | A      | G/A    | A      | A      | .      | A      | G/A    |
| 1          | 16679               | T                           | G                     | T/G         | G      | G      | T/G    | G      | T/G    | G      | G      | .      | G      | T/G    |
| 1          | 16695               | T                           | C                     | .           | .      | .      | .      | .      | T      | T/C    | .      | .      | .      | T/C    |
| 1          | 16701 *             | G                           | A                     | .           | .      | .      | .      | .      | .      | G/A    | .      | .      | .      | G/A    |
| 2          | 158669              | T                           | C                     | C           | C      | T/C    | .      | C      | C      | T/C    | .      | .      | T/C    | T/C    |
| 2          | 158734              | G                           | A                     | A           | A      | G/A    | A      | G/A    | A      | G/A    | A      | G/A    | A      | A      |
| 2          | 158755              | G                           | C                     | .           | .      | .      | .      | .      | .      | .      | .      | .      | .      | .      |
| 2          | 158771 *            | G                           | C                     | .           | .      | .      | .      | .      | .      | .      | .      | .      | .      | .      |
| 2          | 158787 *            | C                           | T                     | .           | .      | .      | T      | .      | .      | .      | T      | C/T    | C/T    | C/T    |
| 2          | 158804              | TT                          | Deletion              | homo        | hetero | .      | .      | homo   | hetero | .      | .      | .      | .      | hetero |
| 2          | 158808              | ACACTTT                     | Deletion              | homo        | .      | .      | .      | hetero | .      | .      | .      | .      | .      | .      |
| 2          | 158838              | A                           | T                     | .           | .      | .      | .      | .      | .      | .      | .      | A/T    | .      | .      |
| 2          | 158870              | T                           | A                     | .           | .      | .      | .      | .      | .      | .      | .      | .      | .      | .      |
| 2          | 158885              | A                           | T                     | .           | .      | T/A    | .      | .      | .      | T/A    | .      | .      | T/A    | .      |
| 2          | 158891              | A                           | T                     | T           | -      | -      | -      | -      | -      | -      | -      | -      | -      | -      |
| 2          | 158905              | C                           | Deletion              | .           | .      | hetero | homo   | -      | -      | hetero | homo   | -      | homo   | -      |
| 2          | 158944              | C                           | A                     | A           | -      | -      | A      | -      | -      | -      | A      | C/A    | A      | -      |
| 2          | 158956              | GTGTATCTTGATAC              | Deletion              | .           | -      | -      | homo   | -      | -      | -      | homo   | hetero | hetero | -      |
| 2          | 158980              | A                           | T                     | .           | -      | -      | T      | -      | -      | -      | T      | -      | -      | -      |
| 2          | 158982              | A                           | G                     | .           | -      | -      | G      | -      | -      | -      | G      | -      | -      | -      |
| 2          | 159021              | A                           | G                     | .           | -      | -      | .      | -      | -      | -      | .      | -      | -      | -      |
| 2          | 159039              | G                           | A                     | .           | -      | -      | .      | -      | -      | -      | .      | -      | -      | -      |
| 2          | 159060              | A                           | G                     | .           | -      | -      | G      | .      | -      | -      | G      | -      | -      | -      |
| 2          | 159072              | A                           | G                     | .           | -      | -      | .      | -      | -      | -      | .      | -      | -      | -      |
| 2          | 159077              | A                           | G                     | .           | -      | -      | G      | .      | -      | -      | G      | -      | -      | -      |
| 2          | 159087              | T                           | Deletion              | .           | -      | -      | .      | -      | -      | -      | .      | -      | -      | -      |
| 2          | 159097              | T                           | C                     | C           | -      | -      | .      | T/C    | -      | -      | .      | -      | -      | -      |
| 2          | 159147              | T                           | A                     | .           | -      | -      | A      | .      | -      | -      | A      | -      | -      | -      |
| 2          | 159148              | A                           | T                     | .           | -      | -      | .      | -      | -      | -      | .      | -      | -      | -      |
| 2          | 159149              | T                           | A                     | A           | -      | -      | A      | T/A    | -      | -      | A      | -      | -      | -      |
| 2          | 159195              | AATA                        | Deletion              | .           | -      | -      | .      | -      | -      | -      | .      | -      | -      | -      |
| 2          | 159261              | T                           | C                     | .           | -      | -      | C      | .      | -      | -      | C      | -      | -      | -      |
| 2          | 159328              | G                           | A                     | .           | -      | -      | .      | -      | -      | -      | .      | -      | -      | -      |
| 2          | 159337 or           |                             |                       |             |        |        |        |        |        |        |        |        |        |        |
| 2          | 159338              | A                           | Deletion              | .           | -      | -      | homo   | .      | -      | -      | homo   | hetero | -      | hetero |
| 2          | 159338 *            | A                           | T                     | .           | -      | -      | .      | .      | -      | -      | .      | A/T    | -      | A/T    |
| 2          | 159340              | G                           | C                     | .           | -      | -      | .      | .      | -      | -      | .      | .      | -      | .      |
| 2          | 159364              | A                           | G                     | .           | -      | -      | .      | .      | -      | -      | .      | .      | -      | .      |
| 2          | 159369              | G                           | A                     | .           | -      | -      | .      | .      | -      | -      | .      | .      | -      | .      |
| 2          | 159373              | A                           | G                     | .           | -      | -      | .      | .      | -      | -      | .      | .      | -      | .      |
| 2          | 159415              | A                           | T                     | .           | -      | -      | T      | .      | -      | -      | T      | A/T    | -      | A/T    |
| 2          | 159416 *            | A                           | G                     | .           | -      | -      | .      | .      | -      | -      | .      | .      | -      | .      |
| 2          | 159419              | G                           | C                     | C           | -      | -      | .      | G/C    | -      | -      | .      | .      | -      | G/A    |
| 2          | 159426 *            | T                           | A                     | .           | -      | -      | .      | .      | -      | -      | .      | .      | -      | .      |
| 2          | 159450              | A                           | G                     | .           | -      | -      | .      | .      | -      | -      | .      | .      | -      | .      |
| 2          | 159451              | G                           | T                     | .           | -      | -      | .      | .      | -      | -      | .      | .      | -      | .      |

|   |           |   |           |        |        |        |        |      |        |        |     |      |        |        |
|---|-----------|---|-----------|--------|--------|--------|--------|------|--------|--------|-----|------|--------|--------|
| 2 | 159458    | C | G         | .      | .      | .      | .      | .    | .      | .      | .   | .    | .      | .      |
| 2 | 159498    | T | A         | .      | .      | .      | .      | .    | .      | .      | .   | .    | .      | .      |
| 2 | 159504 *  | G | A         | .      | .      | .      | .      | .    | .      | .      | .   | .    | .      | .      |
| 2 | 159513    | T | C         | .      | .      | .      | .      | .    | .      | .      | .   | .    | .      | .      |
| 2 | 159557    | G | A         | A      | G/A    | .      | .      | G/A  | G/A    | .      | .   | .    | .      | G/A    |
| 2 | 159569    | A | C         | .      | .      | .      | .      | .    | .      | .      | .   | .    | .      | .      |
| 2 | 159582    | T | C         | .      | T/C    | T/C    | .      | .    | T/C    | T/C    | .   | T/C  | T/C    | T/C    |
| 2 | 159602    | A | C         | .      | A/C    | A/C    | .      | .    | A/C    | A/C    | .   | A/C  | A/C    | A/C    |
| 2 | 159625    | A | G         | .      | .      | .      | .      | .    | .      | .      | .   | .    | .      | .      |
| 2 | 159665    | C | T         | .      | .      | .      | .      | .    | .      | .      | .   | .    | T      | T      |
| 3 | 3549893   | G | A         | A      | A      | A      | A      | A    | .      | G/A    | A   | A    | A      | A      |
| 3 | 3549948 * | G | A         | .      | .      | .      | .      | .    | G/A    | .      | .   | .    | .      | .      |
| 3 | 3550041   | G | A         | A      | A/G    | A/G    | A/G    | A    | .      | G/A    | G/A | A    | .      | A      |
| 3 | 3550047   | A | T         | T      | A/T    | A/T    | A/T    | T    | .      | A/T    | A/T | T    | .      | T      |
| 3 | 3550058 * | C | T         | .      | .      | .      | .      | .    | .      | T      | .   | T    | .      | .      |
| 3 | 3550059 * |   | Insertion | hetero | .      | hetero | hetero | .    | .      | hetero | .   | homo | .      | .      |
| 3 | 3550081   | C | T         | C/T    | C/T    | .      | .      | .    | C/T    | .      | .   | .    | T      | .      |
| 3 | 3550115   | G | A         | G/A    | G/A    | .      | .      | A    | .      | .      | G/A | .    | .      | A      |
| 3 | 3550128   | G | A         | G/A    | .      | .      | .      | .    | G/A    | .      | .   | A    | .      | .      |
| 3 | 3550130   | G | C         | G/C    | G/C    | .      | .      | C    | .      | .      | G/C | .    | G/C    | C      |
| 3 | 3550134   | T | C         | T/C    | T/C    | .      | .      | .    | C      | .      | T/C | C    | C      | .      |
| 3 | 3550136   | A | T         | .      | .      | .      | .      | .    | A/T    | .      | .   | .    | .      | .      |
| 3 | 3550137   | T | G         | .      | .      | .      | .      | .    | T/G    | .      | .   | .    | .      | .      |
| 3 | 3550158   | C | T         | .      | .      | .      | .      | .    | C/T    | .      | .   | .    | .      | .      |
| 3 | 3550180   | G | A         | A      | A      | .      | .      | A    | A      | .      | A   | A    | A      | A      |
| 3 | 3550219   | G | T         | T      | T      | .      | .      | T    | T      | .      | T   | T    | T      | T      |
| 3 | 3550222   | A | T         | .      | .      | .      | .      | .    | .      | .      | .   | .    | .      | .      |
| 4 | 3241059   | G | A         | .      | .      | .      | .      | .    | .      | .      | .   | .    | .      | .      |
| 4 | 3241100   | T | G         | .      | .      | .      | .      | T/G  | .      | .      | .   | .    | .      | .      |
| 4 | 3241150   | A | G         | .      | A/G    | A/G    | .      | .    | A/G    | .      | A/G | .    | .      | A/G    |
| 4 | 3241189   | A | G         | .      | A/G    | .      | A/G    | A/G  | A/G    | .      | .   | .    | .      | A/G    |
| 4 | 3241201   | T | C         | .      | .      | .      | .      | T/C  | .      | .      | .   | .    | .      | .      |
| 4 | 3241204   | A | T         | .      | A/T    | .      | A/T    | .    | .      | .      | .   | .    | T      | A/T    |
| 4 | 3241206   | T | A         | .      | T/A    | .      | T/A    | T/A  | .      | .      | .   | .    | .      | T/A    |
| 4 | 3241216   | T | A         | .      | T/A    | A      | T/A    | T/A  | .      | .      | .   | .    | A      | T/A    |
| 4 | 3241223   | G | C         | .      | .      | .      | .      | G/C  | .      | .      | .   | .    | .      | .      |
| 4 | 3241243   | C | T         | .      | C/T    | .      | C/T    | .    | .      | .      | .   | .    | T      | .      |
| 4 | 3241252   | G | A         | .      | G/A    | .      | G/A    | .    | .      | .      | .   | .    | A      | G/A    |
| 4 | 3241253   | T | C         | .      | T/C    | T/C    | .      | .    | T/C    | .      | T/C | .    | .      | T/C    |
| 4 | 3241258   | C | T         | .      | C/T    | .      | C/T    | C/T  | .      | .      | .   | .    | T      | .      |
| 4 | 3241268 * | A | T         | .      | .      | .      | .      | A/T  | .      | .      | A/T | .    | .      | .      |
| 4 | 3241271   | T | G         | .      | T/G    | .      | T/G    | .    | .      | .      | .   | .    | G      | T/G    |
| 4 | 3241292   | A | G         | .      | A/G    | A/G    | .      | .    | A/G    | .      | A/G | .    | .      | A/G    |
| 4 | 3241297 * |   | Insertion | .      | .      | hetero | .      | .    | .      | hetero | .   | .    | .      | .      |
| 5 | 198495    | C | T         | .      | C/T    | .      | .      | .    | .      | .      | .   | .    | .      | .      |
| 5 | 198503    | T | G         | G      | .      | T/G    | .      | .    | G      | G      | .   | .    | G      | .      |
| 5 | 198514    |   | Insertion | .      | .      | .      | .      | .    | .      | .      | .   | .    | .      | .      |
| 5 | 198535    | C | Deletion  | homo   | hetero | homo   | .      | homo | homo   | homo   | .   | .    | homo   | homo   |
| 5 | 198537    | T | C         | C      | .      | C      | .      | C    | C      | C      | .   | .    | C      | C      |
| 5 | 198548    | T | Deletion  | hetero | .      | hetero | .      | .    | hetero | hetero | .   | .    | hetero | hetero |
| 5 | 198553    | G | A         | .      | .      | .      | .      | .    | .      | .      | .   | .    | .      | .      |
| 5 | 198565    | G | C         | .      | .      | .      | .      | .    | .      | .      | .   | .    | .      | .      |
| 5 | 198605    |   | Insertion | .      | .      | .      | .      | homo | .      | .      | .   | .    | .      | .      |
| 5 | 198619    | G | T         | .      | T      | .      | .      | T    | .      | .      | .   | .    | .      | .      |
| 5 | 198646    | A | G         | .      | .      | .      | .      | .    | .      | .      | .   | .    | .      | .      |
| 5 | 198651    | A | G         | .      | G      | .      | .      | G    | .      | .      | .   | .    | .      | .      |
| 5 | 198657    | T | C         | .      | C      | .      | .      | C    | .      | .      | .   | .    | .      | .      |
| 5 | 198659    | G | C         | .      | .      | .      | .      | .    | .      | .      | .   | .    | .      | .      |
| 5 | 198690    | C | T         | .      | .      | .      | .      | .    | .      | .      | .   | .    | .      | .      |
| 5 | 198736    | C | T         | .      | T      | .      | .      | T    | .      | .      | .   | .    | .      | .      |
| 5 | 198744    | T | C         | .      | C      | .      | .      | .    | .      | .      | .   | .    | .      | .      |
| 5 | 198769    | C | G         | .      | C/G    | .      | .      | G    | .      | .      | .   | .    | .      | .      |
| 5 | 198787 *  | A | Deletion  | .      | .      | .      | .      | .    | .      | .      | .   | .    | .      | .      |
| 5 | 198794    | T | Deletion  | .      | .      | .      | .      | .    | .      | .      | .   | .    | .      | .      |
| 5 | 198821    | G | T         | .      | G/T    | .      | .      | T    | .      | .      | .   | .    | .      | .      |
| 5 | 198829    | T | C         | .      | T/C    | .      | .      | .    | .      | .      | .   | .    | .      | .      |
| 5 | 198834    | G | T         | .      | .      | .      | .      | .    | .      | .      | .   | .    | .      | .      |
| 5 | 198839    | G | A         | .      | G/A    | .      | .      | .    | .      | .      | .   | .    | .      | .      |
| 5 | 198872    | C | T         | .      | .      | .      | .      | .    | .      | .      | .   | .    | .      | .      |
| 5 | 198876    | A | G         | .      | A/G    | .      | .      | G    | .      | .      | .   | .    | .      | .      |
| 5 | 198878    | T | C         | .      | .      | .      | .      | .    | .      | .      | .   | .    | .      | .      |
| 5 | 198886    | A | T         | .      | T      | .      | .      | T    | .      | .      | .   | .    | .      | .      |
| 5 | 198936    | G | Deletion  | .      | .      | .      | .      | .    | .      | .      | .   | .    | .      | .      |
| 5 | 198966 *  | T | C         | .      | .      | .      | .      | .    | .      | .      | .   | .    | .      | .      |
| 5 | 198967    | C | T         | .      | .      | .      | .      | .    | .      | .      | .   | .    | .      | .      |
| 5 | 198972    | C | T         | .      | .      | .      | .      | .    | .      | C/T    | C/T | .    | .      | .      |

|   |          |   |           |        |        |        |        |   |        |        |     |     |        |        |
|---|----------|---|-----------|--------|--------|--------|--------|---|--------|--------|-----|-----|--------|--------|
| 5 | 199012   | C | G         | -      | .      | -      | -      | . | -      | -      | .   | .   | -      | -      |
| 5 | 199014   | A | G         | -      | .      | -      | -      | . | -      | -      | A/G | A/G | -      | -      |
| 5 | 199018 * | G | A         | -      | .      | -      | -      | A | -      | -      | .   | G/A | -      | -      |
| 5 | 199042   | G | A         | -      | .      | -      | -      | . | -      | -      | .   | .   | -      | -      |
| 5 | 199053   | C | A         | -      | -      | -      | -      | A | -      | -      | C/A | A   | -      | -      |
| 5 | 199073   | T | G         | -      | -      | -      | -      | G | -      | -      | T/G | G   | -      | -      |
| 5 | 199106   | T | C         | -      | -      | -      | -      | C | -      | -      | T/C | C   | -      | -      |
| 5 | 199117 * | A | T         | -      | -      | -      | -      | T | -      | -      | A/T | T   | -      | -      |
| 5 | 199129 * | T | A         | -      | -      | -      | -      | A | -      | -      | T/A | A   | -      | -      |
| 5 | 199146   | A | T         | -      | -      | -      | -      | . | -      | -      | .   | .   | -      | -      |
| 5 | 199170   | G | A         | -      | -      | -      | -      | A | -      | -      | G/A | A   | -      | -      |
| 5 | 199192   | T | C         | -      | -      | -      | -      | C | -      | -      | T/C | C   | -      | -      |
| 5 | 199195   | T | C         | -      | -      | -      | -      | . | -      | -      | .   | .   | -      | -      |
| 5 | 199229 * | A | G         | -      | -      | -      | -      | G | -      | -      | A/G | G   | -      | -      |
| 5 | 199272 * | G | A         | -      | -      | -      | -      | A | -      | -      | G/A | A   | -      | -      |
| 5 | 199274 * | A | G         | -      | -      | -      | -      | G | -      | -      | A/G | G   | -      | -      |
| 5 | 199276 * | C | A         | -      | -      | -      | -      | A | -      | -      | C/A | A   | -      | -      |
| 5 | 199317   | G | A         | -      | -      | -      | -      | . | -      | -      | .   | .   | -      | -      |
| 5 | 199326   |   | Insertion | hetero | hetero | hetero | hetero | . | hetero | hetero | .   | .   | hetero | -      |
| 5 | 199336 * | C | T         | .      | .      | .      | .      | . | .      | .      | .   | C/T | .      | -      |
| 5 | 199353   | T | Deletion  | .      | .      | .      | .      | . | .      | .      | .   | .   | .      | hetero |
| 5 | 199409   | T | C         | .      | C      | T/C    | T/C    | C | T/C    | T/C    | T/C | C   | .      | T/C    |

The nucleotides different from the reference are indicated. Two nucleotides are shown for heterozygous sites. Dots indicate the same nucleotide sequences as in the reference. Genomic regions intervened with heterozygous indels were hardly decoded by the direct sequencing method and the undecoded nucleotides are indicated by hyphens. Insertions and deletions found are shown by "hetero" if the sites are heterozygous and by "homo" if the sites are homozygous. Note that only genetic variations found in the alignments of whole-genome shotgun sequences are shown and variations found only in this experiments are not shown for simplicity. Asterisks indicate positions, variations at which are represented by only one JP read.

Table S2. Numbers of genetic variations found in 11 different animals and in whole genome shotgun reads.

|                                                        | Variations found in the validation experiment | Variations not found in the validation experiment |
|--------------------------------------------------------|-----------------------------------------------|---------------------------------------------------|
| Variations found only in the JP dataset                | 67                                            | 23                                                |
| Variations found only in the US (US1 and US2) dataset  | 16                                            | 14                                                |
| Variations found in the JP and the US datasets         | 37                                            | 11                                                |
| Variations not found in the whole genome shotgun reads | 30                                            | -                                                 |

Table S3. Number of synonymous and non-synonymous/nonsense SNPs in genes encoding ribosomal proteins

| Gene                                                | Gene model             | Number of synonymous SNPs | Number of Non-Synonymous/Nonsense SNPs |
|-----------------------------------------------------|------------------------|---------------------------|----------------------------------------|
| Genes encoding non-mitochondrial ribosomal proteins |                        |                           |                                        |
| RPL3                                                | KH.C2.198              | 5                         | 0                                      |
| RPL4                                                | KH.C1.263 & KH.L18.139 | 8                         | 0                                      |
| RPL5                                                | KH.C9.386              | 9                         | 0                                      |
| RPL6                                                | KH.L41.49              | 10                        | 0                                      |
| RPL7                                                | KH.C2.77               | 6                         | 0                                      |
| RPL7A                                               | KH.C3.237              | 5                         | 0                                      |
| RPL8                                                | KH.L123.1              | 6                         | 0                                      |
| RPL9                                                | KH.C14.209             | 0                         | 0                                      |
| RPL10                                               | KH.C12.107             | 2                         | 0                                      |
| RPL10A                                              | KH.C2.28               | 5                         | 0                                      |
| RPL11                                               | KH.L22.58              | 2                         | 0                                      |
| RPL12                                               | KH.C9.73               | 2                         | 1                                      |
| RPL13                                               | KH.S793.1              | 3                         | 0                                      |
| RPL13A                                              | KH.C6.46               | 5                         | 0                                      |
| RPL15                                               | KH.S595.6              | 12                        | 0                                      |
| RPL17                                               | KH.C2.141              | 3                         | 0                                      |
| RPL18                                               | KH.C9.355              | 3                         | 2                                      |
| RPL18A                                              | KH.C8.109              | 1                         | 0                                      |
| RPL19                                               | KH.C1.333              | 4                         | 0                                      |
| RPL21                                               | KH.C2.744              | 1                         | 0                                      |
| RPL22                                               | KH.C1.296              | 6                         | 0                                      |
| RPL23                                               | KH.L24.2               | 2                         | 0                                      |
| RPL23A                                              | KH.L152.7              | 3                         | 0                                      |
| RPL24                                               | KH.C6.158              | 3                         | 0                                      |
| RPL26                                               | KH.C7.70               | 0                         | 0                                      |
| RPL27                                               | KH.L141.29             | 3                         | 0                                      |
| RPL27A                                              | KH.C10.212             | 5                         | 0                                      |
| RPL28                                               | KH.C9.87               | 3                         | 0                                      |
| RPL29                                               | KH.S910.2              | 2                         | 0                                      |
| RPL30                                               | KH.C2.631              | 1                         | 0                                      |
| RPL31                                               | KH.C2.551              | 1                         | 0                                      |
| RPL32                                               | KH.C5.166              | 1                         | 0                                      |
| RPL34                                               | KH.S1840.1             | 1                         | 0                                      |
| RPL35                                               | KH.C9.404              | 0                         | 0                                      |
| RPL35A                                              | KH.C7.10               | 2                         | 0                                      |
| RPL36                                               | KH.C7.196              | 0                         | 0                                      |
| RPL36A                                              | KH.C14.360             | 0                         | 0                                      |
| RPL37                                               | KH.C8.30               | 0                         | 0                                      |
| RPL37A                                              | KH.C9.517              | 0                         | 1                                      |
| RPL38                                               | KH.C8.20               | 0                         | 0                                      |
| RPL39                                               | KH.L20.54              | 2                         | 0                                      |
| RPL40                                               | KH.C4.189              | 1                         | 0                                      |
| RPL41                                               | KH.C9.469              | 0                         | 0                                      |
| RPLP0                                               | KH.C11.21              | 9                         | 0                                      |
| RPLP1                                               | KH.C2.216              | 0                         | 0                                      |
| RPLP2                                               | KH.C11.339             | 1                         | 1                                      |
| RPS2                                                | KH.C5.184              | 6                         | 0                                      |
| RPS3                                                | KH.C2.108              | 1                         | 0                                      |
| RPS3A                                               | KH.C2.693              | 4                         | 0                                      |
| RPS4                                                | KH.C12.188             | 7                         | 0                                      |
| RPS5                                                | KH.C13.29              | 6                         | 0                                      |
| RPS6                                                | KH.L40.23              | 5                         | 1                                      |
| RPS7                                                | KH.S761.1              | 3                         | 0                                      |
| RPS8                                                | KH.L133.9              | 1                         | 1                                      |
| RPS9                                                | KH.C9.358              | 4                         | 0                                      |

|        |            |   |   |
|--------|------------|---|---|
| RPS10  | KH.L170.19 | 3 | 0 |
| RPS11  | KH.C10.57  | 2 | 5 |
| RPS12  | KH.C7.264  | 6 | 0 |
| RPS13  | KH.C11.268 | 3 | 0 |
| RPS14  | KH.C14.231 | 2 | 0 |
| RPS15  | KH.S852.1  | 2 | 1 |
| RPS15A | KH.L10.10  | 1 | 0 |
| RPS16  | KH.S406.5  | 0 | 0 |
| RPS17  | KH.C8.322  | 2 | 0 |
| RPS18  | KH.C12.47  | 4 | 0 |
| RPS19  | KH.C10.101 | 0 | 0 |
| RPS20  | KH.C8.308  | 2 | 0 |
| RPS21  | KH.L147.12 | 0 | 0 |
| RPS23  | KH.L59.2   | 1 | 0 |
| RPS24  | KH.C14.120 | 3 | 0 |
| RPS25  | KH.L95.1   | 1 | 0 |
| RPS26  | KH.C2.257  | 1 | 0 |
| RPS27  | KH.C3.248  | 1 | 0 |
| RPS27A | KH.C10.239 | 6 | 0 |
| RPS28  | KH.C8.209  | 0 | 2 |
| RPS29  | KH.C1.115  | 0 | 0 |
| RPS30  | KH.C10.10  | 4 | 0 |
| RPSA   | KH.C11.148 | 6 | 0 |

Genes encoding mitochondrial ribosomal proteins

|        |            |    |   |
|--------|------------|----|---|
| MRPL1  | KH.L40.19  | 3  | 0 |
| MRPL2  | KH.C8.860  | 0  | 0 |
| MRPL3  | KH.C2.227  | 2  | 0 |
| MRPL4  | KH.C7.55   | 6  | 5 |
| MRPL9  | KH.C1.843  | 8  | 0 |
| MRPL11 | KH.C3.38   | 2  | 0 |
| MRPL13 | KH.C1.86   | 4  | 1 |
| MRPL14 | KH.C7.386  | 7  | 1 |
| MRPL15 | KH.C2.450  | 18 | 4 |
| MRPL16 | KH.C8.756  | 7  | 0 |
| MRPL17 | KH.C12.593 | 2  | 3 |
| MRPL18 | KH.C3.723  | 7  | 5 |
| MRPL19 | KH.L153.19 | 4  | 2 |
| MRPL20 | KH.C4.529  | 12 | 0 |
| MRPL21 | KH.C14.487 | 5  | 3 |
| MRPL22 | KH.C1.975  | 6  | 2 |
| MRPL23 | KH.L9.5    | 3  | 0 |
| MRPL24 | KH.S164.8  | 2  | 0 |
| MRPL27 | KH.L110.2  | 2  | 0 |
| MRPL30 | KH.C2.510  | 6  | 4 |
| MRPL33 | KH.C7.236  | 2  | 0 |
| MRPL35 | KH.C1.1229 | 3  | 2 |
| MRPL37 | KH.C5.380  | 6  | 3 |
| MRPL42 | KH.C8.499  | 4  | 8 |
| MRPL43 | KH.C3.90   | 4  | 3 |
| MRPL45 | KH.S1090.1 | 9  | 7 |
| MRPL47 | KH.C7.228  | 7  | 1 |
| MRPL48 | KH.C8.294  | 2  | 5 |
| MRPL49 | KH.S425.13 | 9  | 7 |
| MRPL52 | KH.C1.328  | 2  | 0 |
| MRPL55 | KH.C8.32   | 0  | 0 |
| MRPS2  | KH.L96.74  | 5  | 1 |
| MRPS5  | KH.C3.121  | 8  | 1 |
| MRPS6  | KH.C1.1257 | 5  | 2 |
| MRPS7  | KH.C5.214  | 7  | 5 |
| MRPS10 | KH.C1.233  | 6  | 5 |
| MRPS11 | KH.C1.1274 | 1  | 3 |
| MRPS12 | KH.C9.151  | 0  | 1 |

|         |            |    |   |
|---------|------------|----|---|
| MRPS14  | KH.L55.1   | 1  | 4 |
| MRPS15  | KH.L153.71 | 6  | 1 |
| MRPS16  | KH.C9.179  | 2  | 0 |
| MRPS17  | KH.C4.354  | 3  | 1 |
| MRPS18A | KH.C11.171 | 4  | 2 |
| MRPS18B | KH.L102.6  | 4  | 2 |
| MRPS22  | KH.C1.209  | 3  | 9 |
| MRPS23  | KH.C12.420 | 8  | 2 |
| MRPS24  | KH.C12.465 | 5  | 1 |
| MRPS25  | KH.C1.220  | 3  | 2 |
| MRPS30  | KH.L96.36  | 11 | 5 |

---



Table S7. Primers used in the present study

| Target chromosome | Forward primer            | Reverse primer              |
|-------------------|---------------------------|-----------------------------|
| Chromosome 1      | 5'-cattgtgcgtttgacg-3'    | 5'-atcgagacacgcagatgtgg-3'  |
| Chromosome 2      | 5'-catctctgtgatttgacg-3'  | 5'-cccaccagaatacattgtacg-3' |
| Chromosome 3      | 5'-atggtgcagaacggaagc-3'  | 5'-tccaaccaggaaagatacg-3'   |
| Chromosome 4      | 5'-gagactcgcaaagtggatg-3' | 5'-ttgccgctgtaactctcc-3'    |
| Chromosome 5      | 5'-accgagaacattgactgtg-3' | 5'-ctcatcatcgtgtgactgc-3'   |
